# Supplementary material
Source: PubMed Central journal article supplement (PMC1774694)
Supplement: gut_2004.058685_1.pdf [file gut_2004.058685_1.pdf]

**Table 2** Baseline autonomic nervous system (ANS) measures of irritable bowel syndrome (IBS) patients by bowel habit

A

| ANS measure | IBS-A (n=45) | IBS-C (n=27) | IBS-D (n=55) |
|-------------|--------------|--------------|--------------|
| SC          | 4.3 (4.0)    | 3.0 (1.4)    | 3.9 (3.6)    |
| PPHF        | 37.3 (17.6)  | 44.0 (19.8)  | 35.9 (19)    |
| PPR         | 2.3 (1.5)    | 1.9 (1.0)    | 2.9 (2.8)    |
